# Supplementary material for: Grafting alters tomato transcriptome and enhances tolerance to an airborne virus infection
Source: PubMed Central journal article supplement (PMC7018947; doi:10.1038/s41598-020-59421-5), 2020-02-13

# **Supplementary Information for**

## ***Scientific Reports***

### **Grafting alters tomato transcriptome and enhances tolerance to an airborne virus infection**

**Roberta Spanò<sup>1,2\*</sup>, Massimo Ferrara<sup>3</sup>, Cinzia Montemurro<sup>1,2</sup>, Giuseppina Mulè<sup>4</sup>, Donato Gallitelli<sup>1,2</sup>, Tiziana Mascia<sup>1,2</sup>**

<sup>1</sup>Dipartimento di Scienze del Suolo della Pianta e degli Alimenti, Università degli Studi di Bari “Aldo Moro”, Via Amendola 165/A, 70126 Bari, Italy

<sup>2</sup>Istituto per la Protezione Sostenibile delle Pianta (IPSP) - CNR, UOS Bari, Via Amendola 122/D, 70126 Bari, Italy

<sup>3</sup>Istituto di Scienze delle Produzioni Alimentari (ISPA) – CNR Via Amendola 122/O, 70126 Bari, Italy

<sup>4</sup>Istituto di Biomembrane, Bioenergetica e Biotecnologie Molecolari – CNR, Via Amendola 122/O, 70126 Bari, Italia

\* Correspondence: e--mail: [r.spanomail@gmail.com](mailto:r.spanomail@gmail.com)

### **Supplementary Figs. S1 to S2**

### **Supplementary Tables S1 to S6**

### **The full-length gel data**

## Supplementary Figures

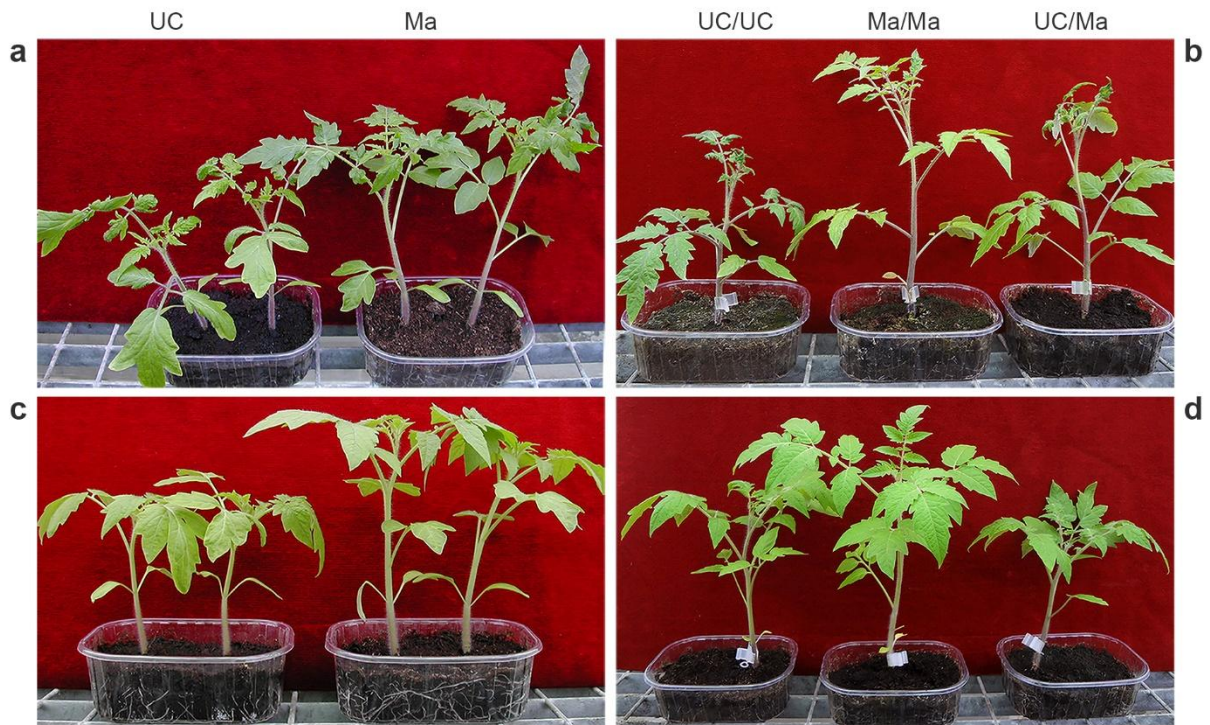

**Figure S1. Disease symptoms.** Disease symptoms induced by PVYC-to at 14 dpi in non-grafted UC and Ma (a) and the three graft combinations UC/UC, Ma/Ma and UC/Ma (b), compared with non infected controls (c, d). Self-grafted UC/UC plants showed a reduced growth compared with UC plants having Ma as rootstock (b). Pictures are from plants of the sets of experiments carried out in spring.



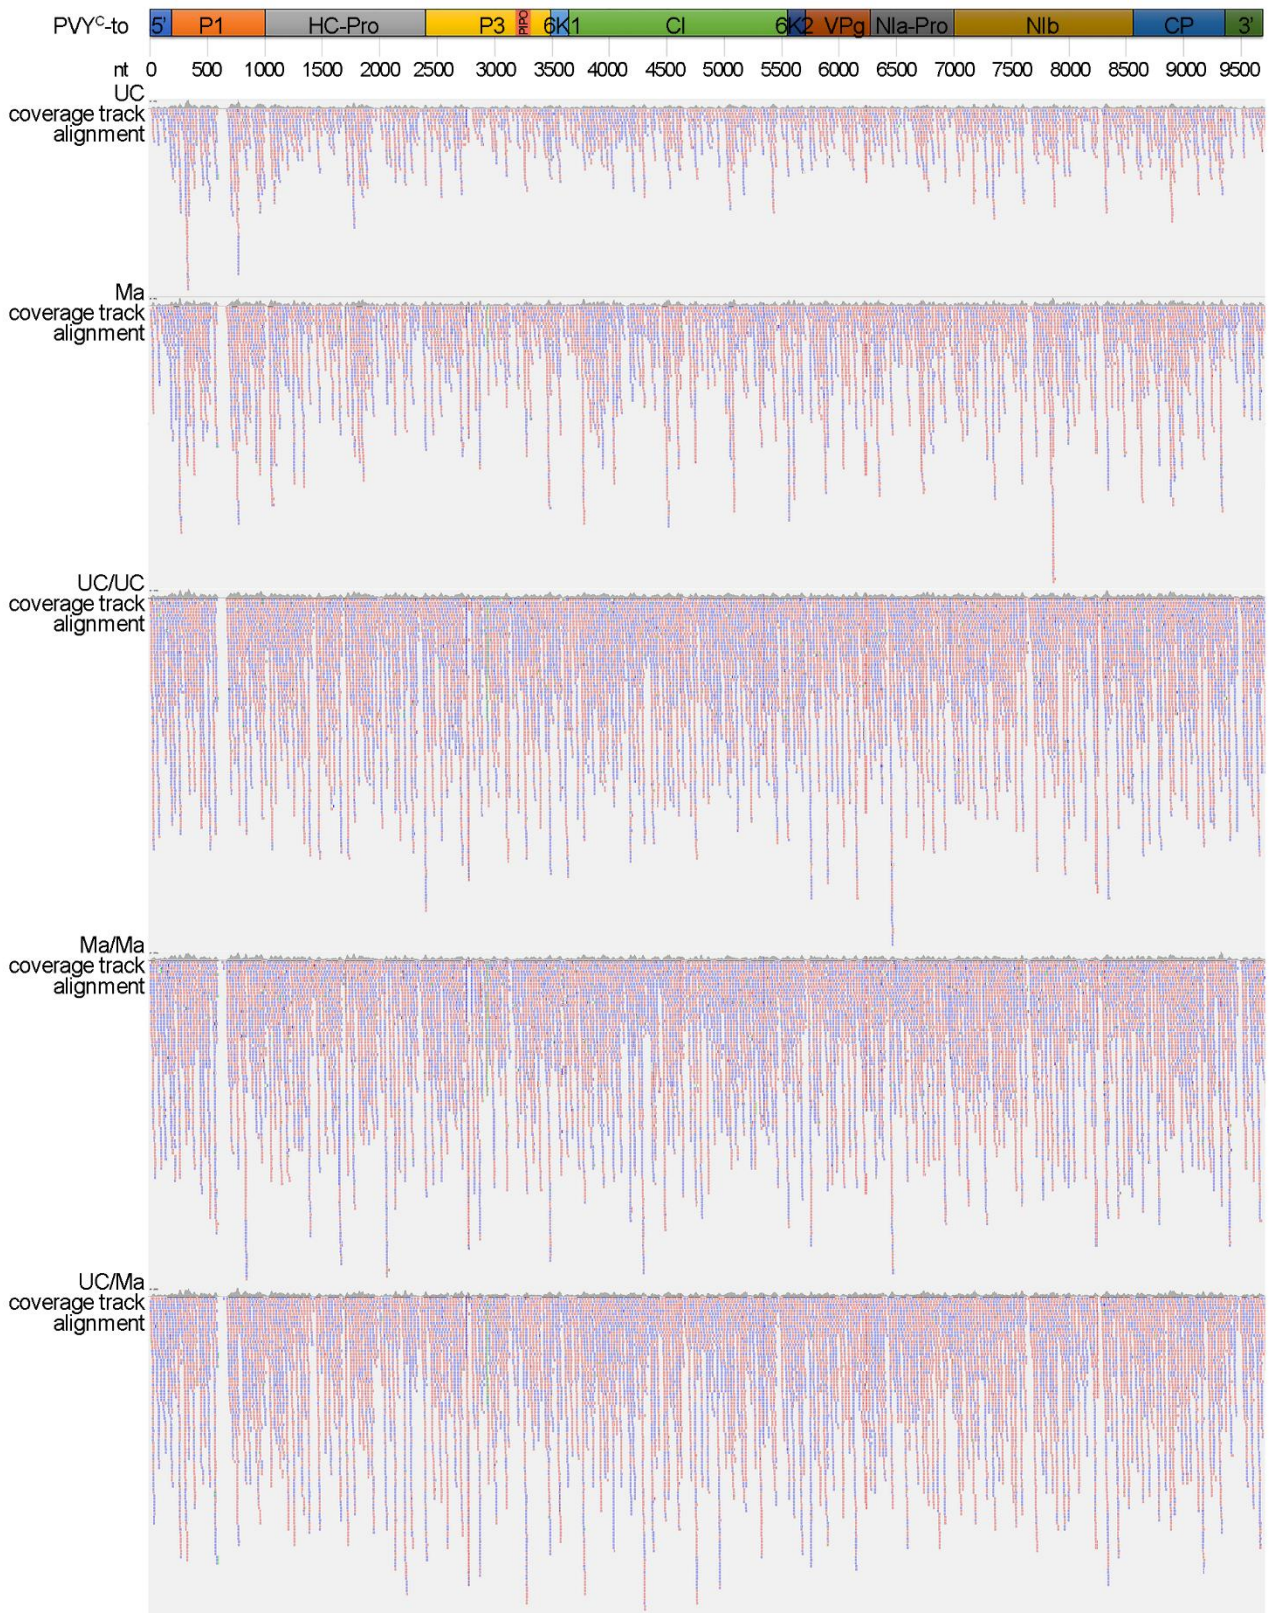

**Figure S2. Mapping of RNA reads (<30 nt) produced by sequencing against PVY<sup>C</sup>-to genome.** Coverage analysis of RNA reads (<30 nt) produced by sequencing of challenged plants against PVY<sup>C</sup>-to reference sequence (acc. N. EU482153). For each condition the alignment of one of the three biological replicates is shown. Reads were aligned with Galaxy Bowtie2 tool (ver. 2.3.4.2) and displayed using the Integrative Genomics Viewer (IGV) tool. For each challenged plant, figure shows coverage track (grey) and color alignment by forward (in red) and reverse read strand (in blue).

## **Supplementary Tables**

**Table S1. DEGs exclusively modulated in response to mock-inoculation in grafted versus non-grafted plants comparison.**

**Table S2. DEGs exclusively modulated by the PVY<sup>C</sup>-to infection in grafted versus non-grafted plants comparison.**

**Table S3. DEGs in common between healthy and infected grafted plants compared to non-grafted.**

**Table S4. DEGs in UC non-grafted plants in response to inoculation with PVY<sup>C</sup>-to.**

**Table S5. DEGs in self-grafted plants in response to inoculation with PVY<sup>C</sup>-to.**

**Table S6. Primers list for RT-qPCR and relative housekeeping (HK) genes used for the normalization.**

| Gene         | Accession N.       |         | Primer sequence (5'-3')      | HK used      |
|--------------|--------------------|---------|------------------------------|--------------|
| <i>ACT</i>   | Solyc03g078400.2.1 | Forward | AGGCAGGATTTGCTGGTGTGATGATGCT | HK           |
|              |                    | Reverse | ATACGCATCCTTCTGTCCCATTCCGA   |              |
| <i>GAPDH</i> | Solyc03g111010.2.1 | Forward | ACCACAAATTGCCTTGCTCCCTTG     | HK           |
|              |                    | Reverse | ATCAACGGTCTTCTGAGTGGCTGT     |              |
| <i>TUB</i>   | Solyc04g081490.2.1 | Forward | CCTGACAGCTTCTGCCATGT         | HK           |
|              |                    | Reverse | CATCTTCAGCCCAGTTGGTG         |              |
| <i>DCL2</i>  | Solyc11g008540.1.1 | Forward | TGGACTGACTCCAGGACTAATT       | <i>GAPDH</i> |
|              |                    | Reverse | GCATGAAGGATGTGCTTGTG         |              |
| <i>DCL3</i>  | Solyc08g067210.2.1 | Forward | CTGATGTGGTTGAGGAGGGA         | <i>ACT</i>   |
|              |                    | Reverse | AGCACGTCCCCTAGATTGGA         |              |
| <i>DCL4</i>  | Solyc07g005030.2.1 | Forward | GACTTGGTGGAGTCTTGTATGG       | <i>ACT</i>   |
|              |                    | Reverse | GCTCATGACGGGCTTTAAGA         |              |
| <i>AGO1</i>  | Solyc06g072300.2.1 | Forward | GGAATTGCTGATTTCCCTCCGTCG     | <i>TUB</i>   |
|              |                    | Reverse | CTGATAGTTGGGTTCTAAAGATGCAC   |              |
| <i>AGO2</i>  | Solyc02g069260.2.1 | Forward | TCTAATGAGCACCTGCCCGA         | <i>GAPDH</i> |
|              |                    | Reverse | TAAGCACAACGCAAGCCCTC         |              |
| <i>AGO4</i>  | Solyc06g073540.2.1 | Forward | TGTGGCTCCGATAAGTTATGCCCA     | <i>TUB</i>   |
|              |                    | Reverse | TGGAGCTAGCAACGTTCTCCTGAA     |              |
| <i>RDR1</i>  | Solyc05g007510.2.1 | Forward | ATGCTGAGGCCATTAGTGTGCTG      | <i>GAPDH</i> |
|              |                    | Reverse | CCAAGCCGAAGCCTTTGGTAACAT     |              |
| <i>RDR3</i>  | Solyc12g008410.1.1 | Forward | CCTACATCAGGTCCACGAATAC       | <i>ACT</i>   |
|              |                    | Reverse | CTGGCCCTGTCTCTGAATTT         |              |
| <i>RDR6</i>  | Solyc04g014870.2.1 | Forward | GCGGCTATAATGTTGAGTGCAGGG     | <i>GAPDH</i> |
|              |                    | Reverse | GTCTTATTCCTGAGGTCGCCAAGC     |              |
| <i>MYB</i>   | Solyc04g005100.2.1 | Forward | AGAGTCGCCGGTGAAGTTA          | <i>ACT</i>   |
|              |                    | Reverse | GGAACAGGAAGAGCTGGTATTG       |              |
| <i>GI</i>    | Solyc04g071990.2.1 | Forward | GCTCTTGCATGTGGAGAGATT        | <i>ACT</i>   |
|              |                    | Reverse | GCATCGATTCCTTGGCTACTT        |              |
| <i>CAI</i>   | Solyc02g086820.2.1 | Forward | TACGTTTGTGGTGGGCTTT          | <i>ACT</i>   |
|              |                    | Reverse | CTGGGAATCCTCTTGTGCT          |              |
| <i>ICS2</i>  | Solyc06g071030.2.1 | Forward | CGCGGATATCTGGGCTTAAT         | <i>GAPDH</i> |
|              |                    | Reverse | CAGTCATCCTCTATGGCAAAGG       |              |
| <i>CSD2</i>  | Solyc11g066390.1.1 | Forward | CCCTTTATGCTGTCACTACCC        | <i>ACT</i>   |
|              |                    | Reverse | TCTTGAGATAGAGTGACAACCC       |              |

# The full-length gel data

## Supplementary Information Figure 1c

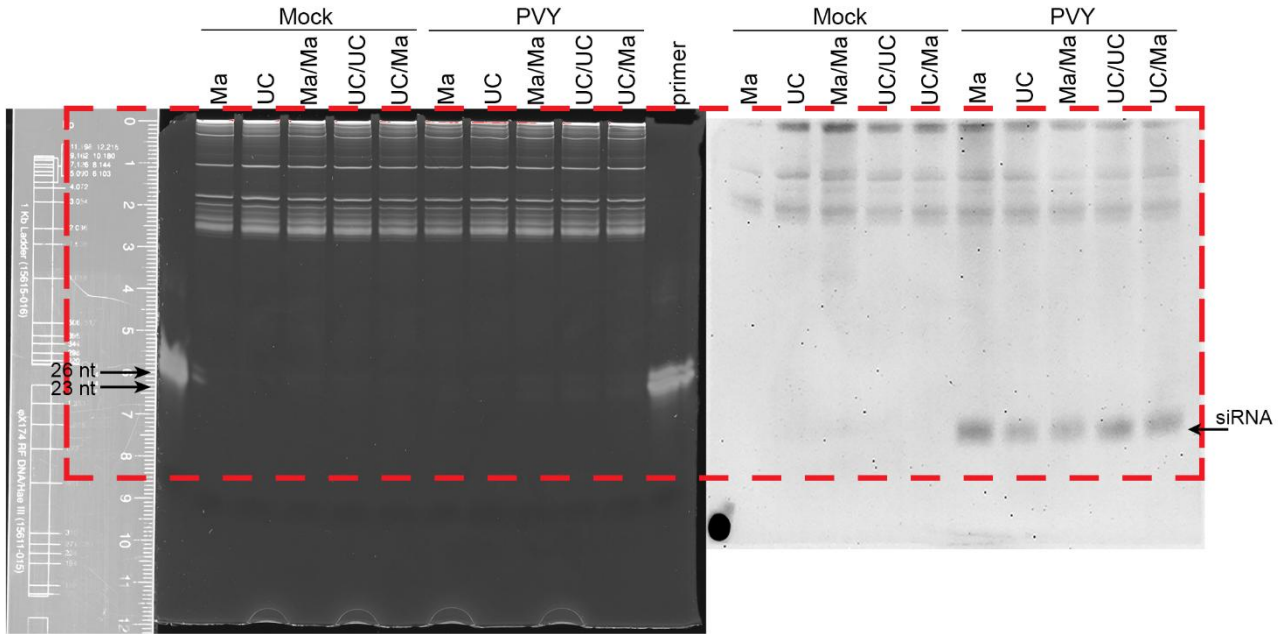

Supplement: 41598_2020_59421_MOESM1_ESM.pdf [file 41598_2020_59421_MOESM1_ESM.pdf]
